# Supplementary material for: Trichoderma-induced restructuring of the cucumber rhizosphere microbiome and the effect of a synthetic, cross-kingdom microbial community on Fusarium wilt disease and growth in cucumber
Source: Research Square preprint supplement (doi:10.21203/rs.3.rs-3442164/v1), 2023-10-27
Supplement: Supplementary file 1 [file 24f8173817029f37188a378b.xlsx]

## Sheet: relabundance_table
phylum	T0	T1	T7	Fo7	T8	Tr8	Fo8	TF8
Proteobacteria	0.528467	0.486257	0.406318	0.409202	0.401957	0.404693	0.449362	0.430137		0.892891	0.895241	0.883814	0.901555	0.888917	0.884815	0.905572	0.892939
Acidobacteria	0.139379	0.175898	0.187198	0.194463	0.201011	0.215557	0.208847	0.220536
Chloroflexi	0.055067	0.0555885	0.165935	0.174658	0.166108	0.157563	0.145067	0.134439
Actinobacteria	0.091841	0.109905	0.0666539	0.0570734	0.0529832	0.0560708	0.0489064	0.0490409
Gemmatimonadetes	0.0781373	0.0675925	0.0577093	0.0661595	0.0668576	0.050931	0.0533897	0.0587854
Bacteroidetes	0.0510204	0.0304166	0.0139609	0.0137375	0.0186566	0.0230202	0.0151771	0.0186077
Patescibacteria	0.0112638	0.017361	0.0361098	0.0243837	0.0256429	0.0239725	0.019814	0.0250601
Nitrospirae	0.0179811	0.0238147	0.0151321	0.0169251	0.0161818	0.0123756	0.0130821	0.012928
Planctomycetes	0.00303388	0.00323581	0.0138987	0.011171	0.0146468	0.0110762	0.0100606	0.0111771
Verrucomicrobia	0.00778125	0.00805806	0.010038	0.00670262	0.00956443	0.00845067	0.00902709	0.00924758
Others	0.0160283	0.0218732	0.0270461	0.0255248	0.0263908	0.0362903	0.0272675	0.030041
