# Supplementary material for: Trichoderma-induced restructuring of the cucumber rhizosphere microbiome and the effect of a synthetic, cross-kingdom microbial community on Fusarium wilt disease and growth in cucumber
Source: Research Square preprint supplement (doi:10.21203/rs.3.rs-3442164/v1), 2023-10-27
Supplement: Supplementary file 2 [file 2c8569133cdb3e6337d8d0d0.xlsx]

## Sheet: relabundance_table
phylum	T0	T1	T7	Fo7	T8	Tr8	Fo8	TF8
Ascomycota	0.215247	0.0641998	0.257262	0.110009	0.267302	0.415091	0.322571	0.254745
Basidiomycota	0.0957638	0.0208904	0.045411	0.021917	0.139484	0.0576611	0.0377519	0.0568988
Chytridiomycota	0.0513363	0.0246098	0.0326571	0.0194734	0.0675817	0.0767552	0.0735844	0.066153
Glomeromycota	8.84129e-05	0.0102252	0.057198	0.027005	0.011346	0.0384347	0.0115393	0.0153742
Mortierellomycota	0.00736984	0.0014398	0.0120233	0.010109	0.00409383	0.0103257	0.0108114	0.00475095
Rozellomycota	0.000903074	0.00318177	0.000848804	0.00346481	0.00316281	0.00189981	0.00221606	0.00213005
Mucoromycota	0	2.66629e-05	0.000857554	0.000405788	0.000436557	0.0145637	0.00117294	0.000135098
Aphelidiomycota	0.000896759	0.000866543	4.37528e-06	0	0	0	0	0
Olpidiomycota	0	0	0	0	0	0.00072613	0	0
Kickxellomycota	0	0	4.37528e-05	0	0	0.000105038	0	5.40392e-05
Others	0	0	0	0	0	0	0	0
Unclassified	0.628394	0.87456	0.593694	0.807616	0.506593	0.384438	0.540353	0.599759
