# Supplementary material for: Trichoderma-induced restructuring of the cucumber rhizosphere microbiome and the effect of a synthetic, cross-kingdom microbial community on Fusarium wilt disease and growth in cucumber
Source: Research Square preprint supplement (doi:10.21203/rs.3.rs-3442164/v1), 2023-10-27
Supplement: Supplementary file 3 [file 9d816d26400c55c3c350d9c8.xlsx]

## Sheet: Sheet1
FJ035		SCCFo1
up-regulated		up-regulated
OTU1148		OTU1016
OTU157		OTU10167
OTU1990		OTU1030
OTU206		OTU122
OTU251		OTU13277
OTU403		OTU13484
OTU44		OTU13866
OTU526		OTU14
OTU705		OTU15995
OTU8476		OTU16
OTU86		OTU2
OTU994		OTU207
		OTU21
		OTU2325
		OTU236
		OTU312
		OTU3401
		OTU3799
		OTU395
		OTU412
		OTU500
		OTU516
		OTU528
		OTU53
		OTU5570
		OTU6410
		OTU644
		OTU71
		OTU7460
		OTU75
		OTU761
		OTU764
		OTU8343
		OTU9
		OTU9305
		OTU9327
		OTU939
		OTU99
