# Supplementary material for: Trichoderma-induced restructuring of the cucumber rhizosphere microbiome and the effect of a synthetic, cross-kingdom microbial community on Fusarium wilt disease and growth in cucumber
Source: Research Square preprint supplement (doi:10.21203/rs.3.rs-3442164/v1), 2023-10-27
Supplement: Supplementary file 4 [file c70a0d8a1b56fc3f192327e1.xlsx]

## Sheet: Sheet1
FJ035		SCCFo1		Continuous cropping
up-regulated	down-regulated	up-regulated	down-regulated	up-regulated	down-regulated
uncultured_bacterium_c_Subgroup_15	Nordella	uncultured_bacterium_o_Subgroup_2	Jatrophihabitans	Bauldia	Sphingomonas
uncultured_bacterium_c_Subgroup_5	Singulisphaera	Aquisphaera	MND1	Ilumatobacter	uncultured_bacterium_f_0319-6G20
uncultured_bacterium_f_BIrii41	uncultured_bacterium_f_Gemmataceae	Bauldia	Polycyclovorans	uncultured_bacterium_c_OLB14	uncultured_bacterium_o_Myxococcales
uncultured_bacterium_f_KF-JG30-B3	uncultured_bacterium_f_Xanthobacteraceae	Gaiella	Thermomonas	Chthonomonas	Actinoallomurus
uncultured_bacterium_o_DS-100	Hyphomicrobium	Hyphomicrobium	uncultured_bacterium_c_Acidimicrobiia	Gaiella	Bdellovibrio
uncultured_bacterium_o_Rhodospirillales	Phaselicystis	IS-44	uncultured_bacterium_c_S0134_terrestrial_group	IS-44	Gemmatirosa
uncultured_bacterium_o_Rokubacteriales	uncultured_bacterium_c_Acidimicrobiia	uncultured_bacterium_c_AT-s3-28	uncultured_bacterium_o_Hyaloperonospora_arabidopsidis	Mesorhizobium	Geothrix
uncultured_bacterium_p_Latescibacteria	uncultured_bacterium_f_Caldilineaceae	uncultured_bacterium_c_Kazania	Acidothermus	Nordella	Granulicella
Acidothermus	uncultured_bacterium_f_Isosphaeraceae	uncultured_bacterium_f_KF-JG30-B3	Acinetobacter	SWB02	Jatrophihabitans
Actinoallomurus	uncultured_bacterium_f_JG30-KF-CM45	uncultured_bacterium_o_Ardenticatenales	Actinoallomurus	uncultured_bacterium_c_JG30-KF-CM66	Massilia
Azohydromonas	uncultured_bacterium_o_IMCC26256	uncultured_bacterium_o_S085	Aeromicrobium	uncultured_bacterium_c_KD4-96	Pajaroellobacter
Bauldia	Actinoallomurus	Allorhizobium-Neorhizobium-Pararhizobium-Rhizobium	Alsobacter	uncultured_bacterium_c_OM190	Pseudolabrys
Chthonomonas	Aeromicrobium	Alterococcus	Arenimonas	uncultured_bacterium_c_Subgroup_6	Reyranella
Conexibacter	Alsobacter	Arenimonas	bacterium_Ellin517	uncultured_bacterium_f_A4b	uncultured_bacterium_c_Acidimicrobiia
Coxiella	Devosia	Asticcacaulis	Candidatus_Koribacter	uncultured_bacterium_f_AKYH767	uncultured_bacterium_f_Acidimicrobiaceae
Dactylosporangium	Gemmatimonas	Bryobacter	Chthonomonas	uncultured_bacterium_f_Caldilineaceae	uncultured_bacterium_f_Beijerinckiaceae
Dokdonella	IS-44	Burkholderia-Caballeronia-Paraburkholderia	Edaphobacter	uncultured_bacterium_f_Desulfarculaceae	uncultured_bacterium_f_Ktedonobacteraceae
Dongia	Legionella	Chthonobacter	Ellin6067	uncultured_bacterium_o_Ardenticatenales	uncultured_bacterium_f_Micromonosporaceae
Gaiella	Mesorhizobium	Chthonomonas	Flavihumibacter	uncultured_bacterium_o_CCD24	uncultured_bacterium_f_Sandaracinaceae
Haliangium	Methylobacterium	CL500-29_marine_group	Flavisolibacter	uncultured_bacterium_o_Elsterales	uncultured_bacterium_f_SC-I-84
Limnobacter	Micropepsis	Dactylosporangium	Flavitalea	uncultured_bacterium_o_MBNT15	uncultured_bacterium_p_GAL15
Novosphingobium	MM2	Dongia	Gemmatirosa	uncultured_bacterium_o_Rokubacteriales	uncultured_bacterium_p_WPS-2
Phenylobacterium	MND1	Haliangium	Geothrix	uncultured_bacterium_o_S085	Alsobacter
Rhodoblastus	Nitrospira	Lacunisphaera	Granulicella	uncultured_bacterium_o_Subgroup_2	Anaeromyxobacter_dehalogenans
Stenotrophomonas	Occallatibacter	Methylibium	Hyphomicrobium	Alterococcus	Asticcacaulis
Streptomyces	Panacagrimonas	MND1	IS-44	Aquicella	Burkholderia-Caballeronia-Paraburkholderia
uncultured_bacterium_c_Alphaproteobacteria	Polycyclovorans	Nordella	JGI_0001001-H03	Aquisphaera	Candidatus_Koribacter
uncultured_bacterium_c_BD2-11_terrestrial_group	possible_genus_04	OM27_clade	Lechevalieria	Arenimonas	Cavicella
uncultured_bacterium_c_Deltaproteobacteria	Pseudoduganella	Pedomicrobium	Limnobacter	Asticcacaulis	Dongia
uncultured_bacterium_c_Kazania	Pseudolabrys	Rhodoblastus	Massilia	Bryobacter	Edaphobacter
uncultured_bacterium_c_Parcubacteria	Pseudonocardia	Roseiarcus	Mesorhizobium	Candidatus_Paracaedibacter	Ellin6067
uncultured_bacterium_c_S0134_terrestrial_group	Rhodoblastus	Sinomonas	Methylobacterium	Candidatus_Udaeobacter	Flavihumibacter
uncultured_bacterium_c_Subgroup_11	Sinomonas	Sulfurifustis	Micropepsis	Candidatus_Xiphinematobacter	Flavisolibacter
uncultured_bacterium_f_Acidimicrobiaceae	Thermomonas	SWB02	mle1-7	Caulobacter	Hamadaea
uncultured_bacterium_f_bacteriap25	uncultured_bacterium_c_KD4-96	Thermomonas	Mycobacterium	Chthonobacter	Ileibacterium
uncultured_bacterium_f_Caulobacteraceae	uncultured_bacterium_c_MB-A2-108	uncultured_bacterium_c_Anaerolineae	Nitrospira	CL500-29_marine_group	JGI_0001001-H03
uncultured_bacterium_f_Hyphomicrobiaceae	uncultured_bacterium_c_Sericytochromatia	uncultured_bacterium_c_BD2-11_terrestrial_group	Noviherbaspirillum	Dongia	Limnobacter
uncultured_bacterium_f_Ktedonobacteraceae	uncultured_bacterium_f_0319-6G20	uncultured_bacterium_c_Deltaproteobacteria	Occallatibacter	Dyella	Micropepsis
uncultured_bacterium_f_Micropepsaceae	uncultured_bacterium_f_A4b	uncultured_bacterium_c_JG30-KF-CM66	Pajaroellobacter	Ensifer	mle1-7
uncultured_bacterium_f_Polyangiaceae	uncultured_bacterium_f_AKYG1722	uncultured_bacterium_c_KD4-96	Panacagrimonas	Haliangium	MND1
uncultured_bacterium_f_Sneathiellaceae	uncultured_bacterium_f_Reyranellaceae	uncultured_bacterium_c_MB-A2-108	Phaselicystis	Hyphomicrobium	Nitrolancea
uncultured_bacterium_f_soil_bacterium_WF55	uncultured_bacterium_f_Rhizobiales_Incertae_Sedis	uncultured_bacterium_c_OLB14	Phenylobacterium	Iamia	Noviherbaspirillum
uncultured_bacterium_f_Steroidobacteraceae	uncultured_bacterium_o_Candidatus_Magasanikbacteria	uncultured_bacterium_c_OM190	Pseudoduganella	Legionella	Occallatibacter
uncultured_bacterium_k_Bacteria	uncultured_bacterium_o_MVP-88	uncultured_bacterium_c_Pla4_lineage	Pseudolabrys	Methylibium	Phenylobacterium
uncultured_bacterium_o_Armatimonadales	uncultured_bacterium_p_WPS-2	uncultured_bacterium_c_Subgroup_11	Ramlibacter	mle1-7	Polycyclovorans
uncultured_bacterium_o_Elsterales	UTCFX1	uncultured_bacterium_c_Subgroup_15	RBG-16-58-14	MM2	Ramlibacter
uncultured_bacterium_o_Obscuribacterales	Variovorax	uncultured_bacterium_c_Subgroup_5	Reyranella	MND1	Rhodanobacter
uncultured_bacterium_o_Subgroup_13		uncultured_bacterium_c_Subgroup_6	Rhodanobacter	Nakamurella	Sandaracinus
uncultured_bacterium_o_Subgroup_2		uncultured_bacterium_f_A0839	Sandaracinus	Novosphingobium	Solirubrobacter
UTBCD1		uncultured_bacterium_f_A21b	Solirubrobacter	Pedomicrobium	Streptomyces
		uncultured_bacterium_f_A4b	Sphingomonas	Phenylobacterium	Thermomonas
		uncultured_bacterium_f_Acidobacteriaceae_Subgroup_1	Steroidobacter	RB41	Thiobacter
		uncultured_bacterium_f_AKYG1722	Thiobacter	Rhodoblastus	uncultured_bacterium_c_Actinobacteria
		uncultured_bacterium_f_AKYH767	uncultured_bacterium_c_AD3	Rhodopila	uncultured_bacterium_c_AD3
		uncultured_bacterium_f_bacteriap25	uncultured_bacterium_c_BD2-11_terrestrial_group	Sandaracinus	uncultured_bacterium_c_BD7-11
		uncultured_bacterium_f_bacterium_enrichment_culture_clone_B302011	uncultured_bacterium_c_BD7-11	SM1A02	uncultured_bacterium_c_Gammaproteobacteria
		uncultured_bacterium_f_BIrii41	uncultured_bacterium_c_Kazania	Sporichthya	uncultured_bacterium_c_MB-A2-108
		uncultured_bacterium_f_Caldilineaceae	uncultured_bacterium_c_OM190	Sporocytophaga	uncultured_bacterium_c_S0134_terrestrial_group
		uncultured_bacterium_f_Desulfarculaceae	uncultured_bacterium_c_P2-11E	Stenotrophomonas	uncultured_bacterium_c_WCHB1-81
		uncultured_bacterium_f_Devosiaceae	uncultured_bacterium_c_Sericytochromatia	uncultured_bacterium_c_Acidimicrobiia	uncultured_bacterium_f_Acidobacteriaceae_Subgroup_1
		uncultured_bacterium_f_Eel-36e1D6	uncultured_bacterium_c_TK10	uncultured_bacterium_c_Anaerolineae	uncultured_bacterium_f_Amb-16S-1034
		uncultured_bacterium_f_Fibrobacteraceae	uncultured_bacterium_c_WCHB1-81	uncultured_bacterium_c_AT-s3-28	uncultured_bacterium_f_Caulobacteraceae
		uncultured_bacterium_f_Fimbriimonadaceae	uncultured_bacterium_f_0319-6G20	uncultured_bacterium_c_Berkelbacteria	uncultured_bacterium_f_Chitinophagaceae
		uncultured_bacterium_f_Gemmataceae	uncultured_bacterium_f_A4b	uncultured_bacterium_c_Deltaproteobacteria	uncultured_bacterium_f_Diplorickettsiaceae
		uncultured_bacterium_f_Hydrogenedensaceae	uncultured_bacterium_f_Acidimicrobiaceae	uncultured_bacterium_c_Gammaproteobacteria	uncultured_bacterium_f_Eel-36e1D6
		uncultured_bacterium_f_Isosphaeraceae	uncultured_bacterium_f_Acidobacteriaceae_Subgroup_1	uncultured_bacterium_c_Kazania	uncultured_bacterium_f_Elsteraceae
		uncultured_bacterium_f_P3OB-42	uncultured_bacterium_f_AKYG1722	uncultured_bacterium_c_MB-A2-108	uncultured_bacterium_f_env.OPS_17
		uncultured_bacterium_f_Rhodocyclaceae	uncultured_bacterium_f_AKYH767	uncultured_bacterium_c_Pla4_lineage	uncultured_bacterium_f_Gemmataceae
		uncultured_bacterium_f_Roseiflexaceae	uncultured_bacterium_f_B1-7BS	uncultured_bacterium_c_Subgroup_17	uncultured_bacterium_f_Ilumatobacteraceae
		uncultured_bacterium_f_Sneathiellaceae	uncultured_bacterium_f_Beijerinckiaceae	uncultured_bacterium_f_A0839	uncultured_bacterium_f_JG30-KF-AS9
		uncultured_bacterium_f_soil_bacterium_WF55	uncultured_bacterium_f_BIrii41	uncultured_bacterium_f_AB1	uncultured_bacterium_f_Leeiaceae
		uncultured_bacterium_f_TRA3-20	uncultured_bacterium_f_Desulfarculaceae	uncultured_bacterium_f_AKYG1722	uncultured_bacterium_f_Magnetospiraceae
		uncultured_bacterium_f_URHD0088	uncultured_bacterium_f_Diplorickettsiaceae	uncultured_bacterium_f_bacteriap25	uncultured_bacterium_f_Micrococcaceae
		uncultured_bacterium_f_Xanthobacteraceae	uncultured_bacterium_f_Eel-36e1D6	uncultured_bacterium_f_bacterium_enrichment_culture_clone_B302011	uncultured_bacterium_f_Microscillaceae
		uncultured_bacterium_k_Bacteria	uncultured_bacterium_f_Gemmatimonadaceae	uncultured_bacterium_f_Devosiaceae	uncultured_bacterium_f_mle1-27
		uncultured_bacterium_o_11-24	uncultured_bacterium_f_Ilumatobacteraceae	uncultured_bacterium_f_Diplorickettsiaceae	uncultured_bacterium_f_Moraxellaceae
		uncultured_bacterium_o_Acidobacteriales	uncultured_bacterium_f_Isosphaeraceae	uncultured_bacterium_f_Eel-36e1D6	uncultured_bacterium_f_Rhizobiales_Incertae_Sedis
		uncultured_bacterium_o_Armatimonadales	uncultured_bacterium_f_JG30-KF-CM45	uncultured_bacterium_f_Fibrobacteraceae	uncultured_bacterium_f_Rhodanobacteraceae
		uncultured_bacterium_o_bacterium_Ellin6543	uncultured_bacterium_f_Ktedonobacteraceae	uncultured_bacterium_f_Fimbriimonadaceae	uncultured_bacterium_f_Rhodocyclaceae
		uncultured_bacterium_o_CCD24	uncultured_bacterium_f_Leeiaceae	uncultured_bacterium_f_Gemmataceae	uncultured_bacterium_f_Rhodospirillaceae
		uncultured_bacterium_o_Chitinophagales	uncultured_bacterium_f_Magnetospiraceae	uncultured_bacterium_f_Gemmatimonadaceae	uncultured_bacterium_f_Sphingomonadaceae
		uncultured_bacterium_o_DS-100	uncultured_bacterium_f_Microbacteriaceae	uncultured_bacterium_f_Holosporaceae	uncultured_bacterium_f_TRA3-20
		uncultured_bacterium_o_Elsterales	uncultured_bacterium_f_Micrococcaceae	uncultured_bacterium_f_Hydrogenedensaceae	uncultured_bacterium_o_Acidobacteria_bacterium_IGE-011
		uncultured_bacterium_o_MBNT15	uncultured_bacterium_f_Micromonosporaceae	uncultured_bacterium_f_Isosphaeraceae	uncultured_bacterium_o_Candidatus_Berkelbacteria_bacterium_RIFCSPHIGHO2_12_FULL_50_11
		uncultured_bacterium_o_Myxococcales	uncultured_bacterium_f_Microscillaceae	uncultured_bacterium_f_KF-JG30-B3	uncultured_bacterium_o_Chthonomonadales
		uncultured_bacterium_o_Obscuribacterales	uncultured_bacterium_f_mle1-27	uncultured_bacterium_f_Magnetospiraceae	uncultured_bacterium_o_Frankiales
		uncultured_bacterium_o_RBG-13-54-9	uncultured_bacterium_f_Reyranellaceae	uncultured_bacterium_f_Reyranellaceae	uncultured_bacterium_o_Ga0077536
		uncultured_bacterium_o_RCP2-54	uncultured_bacterium_f_Rhizobiales_Incertae_Sedis	uncultured_bacterium_f_Rhodanobacteraceae	uncultured_bacterium_o_Gaiellales
		uncultured_bacterium_o_Rhizobiales	uncultured_bacterium_f_Rhodanobacteraceae	uncultured_bacterium_f_Rhodocyclaceae	uncultured_bacterium_o_JG36-TzT-191
		uncultured_bacterium_o_Rokubacteriales	uncultured_bacterium_f_Rhodospirillaceae	uncultured_bacterium_f_Roseiflexaceae	uncultured_bacterium_o_KF-JG30-C25
		uncultured_bacterium_o_SBR1031	uncultured_bacterium_f_Roseiflexaceae	uncultured_bacterium_f_Sandaracinaceae	uncultured_bacterium_o_Lineage_IV
		uncultured_bacterium_o_Subgroup_12	uncultured_bacterium_f_Sandaracinaceae	uncultured_bacterium_f_SC-I-84	uncultured_bacterium_o_R7C24
		uncultured_bacterium_o_Subgroup_13	uncultured_bacterium_f_SC-I-84	uncultured_bacterium_f_SM2D12	uncultured_bacterium_o_Saccharimonadales
		uncultured_bacterium_p_Latescibacteria	uncultured_bacterium_f_SM2D12	uncultured_bacterium_f_Sneathiellaceae	uncultured_bacterium_o_SAR324_cladeMarine_group_B
		uncultured_bacterium_p_WS2	uncultured_bacterium_f_Sphingomonadaceae	uncultured_bacterium_f_Solimonadaceae	uncultured_bacterium_o_uncultivated_soil_bacterium_clone_C112
		Variovorax	uncultured_bacterium_o_Aminicenantales	uncultured_bacterium_f_Steroidobacteraceae
			uncultured_bacterium_o_Chthonomonadales	uncultured_bacterium_f_Vermiphilaceae
			uncultured_bacterium_o_Frankiales	uncultured_bacterium_f_Xanthobacteraceae
			uncultured_bacterium_o_Ga0077536	uncultured_bacterium_k_Bacteria
			uncultured_bacterium_o_IMCC26256	uncultured_bacterium_o_11-24
			uncultured_bacterium_o_JG36-TzT-191	uncultured_bacterium_o_Acidobacteriales
			uncultured_bacterium_o_MVP-88	uncultured_bacterium_o_Candidatus_Berkelbacteria_bacterium_RIFCSPHIGHO2_12_FULL_50_11
			uncultured_bacterium_o_Myxococcales	uncultured_bacterium_o_Chlamydiales
			uncultured_bacterium_o_R7C24	uncultured_bacterium_o_Chloroplast
			uncultured_bacterium_o_Rhodospirillales	uncultured_bacterium_o_Chthonomonadales
			uncultured_bacterium_o_Rokubacteriales	uncultured_bacterium_o_DS-100
			uncultured_bacterium_o_Saccharimonadales	uncultured_bacterium_o_IMCC26256
			uncultured_bacterium_o_SAR324_cladeMarine_group_B	uncultured_bacterium_o_JG36-TzT-191
			uncultured_bacterium_p_WPS-2	uncultured_bacterium_o_Obscuribacterales
			UTCFX1	uncultured_bacterium_o_R7C24
				uncultured_bacterium_o_RBG-13-54-9
				uncultured_bacterium_o_RCP2-54
				uncultured_bacterium_o_Rhizobiales
				uncultured_bacterium_o_Rhodospirillales
				uncultured_bacterium_o_Saccharimonadales
				uncultured_bacterium_o_SBR1031
				uncultured_bacterium_o_WCHB1-41
				uncultured_bacterium_p_BRC1
				uncultured_bacterium_p_Chloroflexi
				uncultured_bacterium_p_FCPU426
				uncultured_bacterium_p_Latescibacteria
				uncultured_bacterium_p_WS2
				UTCFX1
